# Supplementary material for: Multidisciplinary Approach to Rainfall-Triggered Rockfalls: the Case Study of the Disaster of the Ancient Hydrothermal Sclafani Spa (Madonie Mts., Northern-Central Sicily, Italy) in 1851
Source: Copernicus journal article supplement (doi:10.5194/nhess-2016-397), 2017-01-04
Supplement: Supplementary file 1 [file nhess-2016-397-supplement.pdf]

# Multidisciplinary Approach to Rainfall-Triggered Rockfalls: the Case Study of the Disaster of the Ancient Hydrothermal Sclafani Spa (Madonie Mts., Northern-Central Sicily, Italy) in 1851

Antonio Contino<sup>1,2</sup>, Patrizia Bova<sup>2</sup>, Giuseppe Esposito<sup>1,2</sup>, Ignazio Giuffrè<sup>2</sup> and Salvatore Monteleone<sup>1</sup>

<sup>1</sup>Dipartimento di Scienze della Terra e del Mare (DiSTeM), University of Palermo, Via Archirafi 20/22, 90123 Palermo, Italy.

<sup>2</sup>Accademia Mediterranea Euracea di Scienze, Lettere e Arti (AMESLA), Via Gregorio Ugdulena 62, 90018 Termini Imerese (Palermo), Italy.

## Supplementary Information

**Table S1 | Dataset: selected documentary evidences previous to the disaster of the ancient hydrothermal Sclafani spa in 1851 - data provided by Antonio Contino, Patrizia Bova and Giuseppe Esposito.**

| Sources  | Originator(s)                                                                                             | Title                                                                                                                                                                                                                                     | Archive |
|----------|-----------------------------------------------------------------------------------------------------------|-------------------------------------------------------------------------------------------------------------------------------------------------------------------------------------------------------------------------------------------|---------|
| Source 1 | Antonino, Mongitore (b. 1 May 1663 – d. 6 Juny 1743)<br>Sicilian historian                                | Della Sicilia ricercata nelle cose più memorabili, In Palermo MDCCXLIII, Valenza, Tomo secondo, 504 pp. [see p. 273].                                                                                                                     |         |
| Source 2 | Niccolò, Cacciatore (b. 26 January 1780 – d. 28 January 1841)<br>Sicilian astronomer                      | Viaggio ai Bagni Minerali di Sclafani. Palermo, Reale Stamperia, M.DCCC.XXVIII, estratto dal Giornale di Scienze Lettere e Arti per la Sicilia, n.o LXX, 52 pp. [see p. 16].                                                              |         |
| Source 3 | Giovanna (Jeanne), Power née De Villepreux (b. 25 September 1794 – d. 1871)<br>French-Sicilian Naturalist | Guida per la Sicilia, Napoli, Cirelli, 1842, 382 pp. [see p. 243-244]                                                                                                                                                                     |         |
| Source 4 | Pietro, Calcara (b. 16 February 1819 – d. 24 August 1854)<br>Sicilian naturalist                          | Osservazioni geognostiche sopra Caltavuturo e Sclafani (lette nella tornata ordinaria del dì 7 gennaio 1844), in: Atti della Accademia di Scienze e Lettere di Palermo, nuova serie, vol. I, Morvillo, Palermo, 1845, 18 pp. [see p. 16]. |         |

|          |                                                                                                                                                                                                                                                                                                                                                                                                                                                                                                                                                                                                                                                                                                                                                                                                                                                                                                                                                                                                                                                                                                                                                                                                                                                                                                                                                                                                                                                                                                                                                                                                                                                                                                                                                                                                                                                                                                                             |
|----------|-----------------------------------------------------------------------------------------------------------------------------------------------------------------------------------------------------------------------------------------------------------------------------------------------------------------------------------------------------------------------------------------------------------------------------------------------------------------------------------------------------------------------------------------------------------------------------------------------------------------------------------------------------------------------------------------------------------------------------------------------------------------------------------------------------------------------------------------------------------------------------------------------------------------------------------------------------------------------------------------------------------------------------------------------------------------------------------------------------------------------------------------------------------------------------------------------------------------------------------------------------------------------------------------------------------------------------------------------------------------------------------------------------------------------------------------------------------------------------------------------------------------------------------------------------------------------------------------------------------------------------------------------------------------------------------------------------------------------------------------------------------------------------------------------------------------------------------------------------------------------------------------------------------------------------|
| Source 1 | <i>Nel piano, che sta di sotto a perpendicolo della Terra [abitato] di Sclafani, v'ha [sic, vi è] un Bagno d'acqua calda, sulfurea, e salsa giovevole a molte infermità.</i>                                                                                                                                                                                                                                                                                                                                                                                                                                                                                                                                                                                                                                                                                                                                                                                                                                                                                                                                                                                                                                                                                                                                                                                                                                                                                                                                                                                                                                                                                                                                                                                                                                                                                                                                                |
| Source 2 | <i>Tra le due colline in cui sta lo stabilimento [case dei Bagni], lungo un profondo burrone che quivi [sic, lì] per un miglio [siciliano, 1,48 km] circa si avvalla sino al fiume, l'uno sotto l'altro sono costruiti quattro mulini: a mettere i quali per un' ora al giorno in movimento, a lato ai bagni si è costruito un argine, che rattiene [sic, arresta] e raccoglie le acque de' [sic, dei] medesimi in un esteso e poco profondo stagnone. In esso appunto, finché l'acqua non si è fatta scorrere su i mulini, si fanno giornalmente nuotare cavalli, cani, bestie a corno, che in gran numero da ogni parte vi son condotte per curarle dalla scabia [sic, scabbia] e dagli altri mali (...) [p. 16].</i><br><br><i>Sito e natura de' luoghi. (...) ....un'alta ed aspra roccia, che ha quattro miglia di circuito. Accessibile questa roccia per una difficile e disastrosa via che gli serpeggia a sud-est, resta quasi tagliata a picco dalla parte di nord-ovest; e quivi al suo piede, alla profondità di 180 [sic, 18] canne siciliane [16,5 m], tra due colli non molto alti che le si appoggiano, in una vallea aperta a ponente e maestro [nord], sorge l'acqua termale. Ma seppellita la vera sorgente sotto i sassi, la terra, le materie, che, coll'andar de' secoli, cascate dalla parte superiore di un'alta e ripida falda hanno formato a piè del monte, esce ora l'acqua per un antico acquidotto [sic, acquedotto] alla distanza di 15 canne [30,9 m]; e questo punto si chiama la testa delle acque. L'acquedotto coperto a tre palmi [0,77 m] sotterra [sic, sotto terra] è stato continuato per 24 canne [49,5 m] sino alle vasche de' bagni, le quali restano a tramontana della sorgente sul fianco orientale della vallea [sic, valle] nella quale sgorgano, mentre questa scende gradatamente per un miglio sino al fiume [Salito, affluente dell'Imera settentrionale] [p. 18].</i> |
| Source 3 | <i>A due miglia [2,97km], al piede del Monte di Sclafani, scaturiscono acque termali in una grotta che per via di un acquidotto [sic, acquedotto] coperto scorrono nella vasca contigua a' [sic, ai] bagni. Queste acque sono eccellenti per varie malattie croniche.</i>                                                                                                                                                                                                                                                                                                                                                                                                                                                                                                                                                                                                                                                                                                                                                                                                                                                                                                                                                                                                                                                                                                                                                                                                                                                                                                                                                                                                                                                                                                                                                                                                                                                   |
| Source 4 | <i>L'acqua termo-minerale che scaturisce a piè [sic, piedi] della montagna di Sclafani, è quella tanto celebrata per la sua nota virtù contro le malattie della pelle. Quest'acqua dal punto ove scaturisce dividesi in due porzioni: una meno abbondante va ad introdursi nel sudicio ed angusto locale de' bagni l'altra riunendosi con l'acqua reflua de' bagni si scarica in un largo bacino,</i>                                                                                                                                                                                                                                                                                                                                                                                                                                                                                                                                                                                                                                                                                                                                                                                                                                                                                                                                                                                                                                                                                                                                                                                                                                                                                                                                                                                                                                                                                                                       |

|  |                                                                                                                                   |
|--|-----------------------------------------------------------------------------------------------------------------------------------|
|  | <i>serve poscia sviandosi [sic, allontanandosi] da questo sito a far muovere un contiguo molino. (...) Palermo 4 luglio 1843.</i> |
|--|-----------------------------------------------------------------------------------------------------------------------------------|

**Table S2 | Dataset: selected documentary evidences of the disaster of the ancient hydrothermal Sclafani spa in 1851 - data provided by Antonio Contino, Patrizia Bova and Giuseppe Esposito.**

| Sources    | Originator(s)                                                                | Title                                                                                                                                                                                                                                                                                                                                                                                                                                                                                                                                  | Archive                                                                                                  |
|------------|------------------------------------------------------------------------------|----------------------------------------------------------------------------------------------------------------------------------------------------------------------------------------------------------------------------------------------------------------------------------------------------------------------------------------------------------------------------------------------------------------------------------------------------------------------------------------------------------------------------------------|----------------------------------------------------------------------------------------------------------|
| Source 1   | Anonymous                                                                    | Deliberazione del decurionato di Sclafani, 1° Aprile 1850 – Orazio Sciarrino 2° eletto facente funzione di Sindaco”, in: Distretto di Termini Imerese - Spese pubbliche di Sclafani - Spese Comunali, fascicolo 2, espediente 16 - Maggio 1849 - 1°, Oggetto: Per gli acconci nelle strade interne.                                                                                                                                                                                                                                    | Pandetta Intendenza di Palermo, MS. 2360 (Sclafani), State Archive of Palermo (Section Catena), 1849-60. |
| Source 2   | Antonino, Orlando, Termini's District Director                               | Lettera del Sottintendente del Distretto di Termini, 11 settembre 1851, all'Intendente di Palermo, in: Distretto di Termini Imerese - Spese pubbliche di Sclafani - Spese Comunali, fascicolo 12 - Maggio 1849 – Comune di Sclafani.                                                                                                                                                                                                                                                                                                   | Pandetta Intendenza di Palermo, MS. 2360 (Sclafani), State Archive of Palermo (Section Catena), 1849-60. |
| Source 3   | Anonymous                                                                    | Lettera del 25 novembre 1851, su carta intestata del Corpo degli Ingegneri di Acque e Strade - Lavori Pubblici della Provincia di Palermo n. 123, indirizzata all'Intendente di Palermo, Oggetto: Per i mulini di Sclafani, in: Distretto di Termini Imerese - Spese pubbliche di Sclafani - Spese Comunali, fascicolo 12 - Maggio 1849 – Comune di Sclafani.                                                                                                                                                                          | Pandetta Intendenza di Palermo, MS. 2360 (Sclafani), State Archive of Palermo (Section Catena), 1849-60. |
| Source 4   | Anonymous                                                                    | Lettera all'Intendente di Palermo, datata 8 aprile 1851, in: Distretto di Termini Imerese - Spese pubbliche di Sclafani - Fascicolo n. 1, espediente 2 – Oggetto: Opere pubbliche nelle strade esterne.                                                                                                                                                                                                                                                                                                                                | Pandetta Intendenza di Palermo, MS. 2360 (Sclafani), State Archive of Palermo (Section Catena), 1849-60. |
| Source 5   | Antonino, Orlando Termini's District Director                                | Lettera del Sottintendente di Termini (n. 1419 – Termini, 28 marzo 1851) all'Intendente di Palermo nella quale è riportata parte di una precedente missiva del Sindaco di Sclafani relativa all'alluvione del Marzo 1851, in: Distretto di Termini Imerese - Spese pubbliche di Sclafani - Fascicolo n. 1, espediente 2 – Oggetto: Opere pubbliche nelle strade esterne.                                                                                                                                                               | Pandetta Intendenza di Palermo, MS. 2360 (Sclafani), State Archive of Palermo (Section Catena), 1849-60. |
| Source 6   | Anonymous                                                                    | Lettera (Palermo, 18 agosto 1851) indirizzata all'Intendente di Palermo, in: Distretto di Termini Imerese - Spese pubbliche di Sclafani - fascicolo n. 1, espediente 2 – Oggetto: Opere pubbliche nelle strade esterne.                                                                                                                                                                                                                                                                                                                | Pandetta Intendenza di Palermo, MS. 2360 (Sclafani), State Archive of Palermo (Section Catena), 1849-60. |
| Source 7   | Anonymous                                                                    | Deliberazione del Decurionato di Sclafani, 25 gennaio 1854 – Oggetto: Frana per copiose acque nel detto mese, in: Distretto di Termini Imerese - Spese pubbliche di Sclafani - fascicolo n. 1, espediente 2 – Oggetto: Opere pubbliche nelle strade esterne.                                                                                                                                                                                                                                                                           | Pandetta Intendenza di Palermo, MS. 2360 (Sclafani), State Archive of Palermo (Section Catena), 1849-60. |
| Source 8-9 | (8) Anonymous (Girolamo Artale?); (9) Antonino, Orlando Director of District | (8) Memoria di fatto sugli [sic] Bagni di Sclafani, 21 febbraio [1854] n. 3838) in: Intendenza della Provincia di Palermo 3° Ufficio Carico N. 1 – Spese Comunali rubrica opere pubbliche N. 1, espediente N. 6 – Oggetto: Per la ricostruzione dei Bagni Minerali.<br>(9) Lettera del Sottintendente del Distretto di Termini all'Intendente di Palermo, Termini, 24 marzo 1854 – n. 2559, in: Distretto di Termini Imerese - Spese pubbliche di Sclafani - fasc. n. 1, espediente 2 – Oggetto: Opere pubbliche nelle strade esterne. | Pandetta Intendenza di Palermo, MS. 2360 (Sclafani), State Archive of Palermo (Section Catena), 1849-60. |
| Source 10  | Anonymous                                                                    | Deliberazione del Decurionato di Sclafani, 30 aprile 1855 – Antonino feudale, sindaco. Oggetto: richiesta che sia riedificato il locale dei bagni, in: Intendenza della Provincia di Palermo 3° Ufficio Carico N. 1 – Spese Comunali rubrica opere pubbliche N. 1, espediente N. 6 – Oggetto: Per la ricostruzione dei Bagni Minerali.                                                                                                                                                                                                 | Pandetta Intendenza di Palermo, MS. 2360 (Sclafani), State Archive of Palermo (Section Catena), 1849-60. |
| Source 11  | Girolamo, Artale Ferrandina's Duchy Administrator                            | Lettera dell'Amministrazione della Ducea (ducato) di Ferrandina, datata 27 febbraio 1856, relativa alla pretesa dei abitanti di Sclafani che sia riedificato il locale di quei bagni, in: Intendenza della Provincia di Palermo 3° Ufficio, Carico N. 1 – Spese Comunali rubrica opere pubbliche N.1, espediente N. 6 – Oggetto: Per la ricostruzione dei Bagni Minerali.                                                                                                                                                              | Pandetta Intendenza di Palermo, MS. 2360 (Sclafani), State Archive of Palermo (Section Catena), 1849-60. |
| Source 12  | Anonymous                                                                    | Supplica degli abitanti di Sclafani all'Intendente di Palermo, relativa ai mulini distrutti dalla frana del Marzo 1851, Sclafani 24 Dicembre 1858, in: Distretto di Termini Imerese - Spese pubbliche di Sclafani – Fascicolo n. 10 - Oggetto: Opere pubbliche , parte 4a, Ricostruzione del Mulino.                                                                                                                                                                                                                                   | Pandetta Intendenza di Palermo, MS. 2360 (Sclafani), State Archive of                                    |

|           |                                                                                                                                        |                                                                                                                                                                                                                                                                                         |                                                                                     |
|-----------|----------------------------------------------------------------------------------------------------------------------------------------|-----------------------------------------------------------------------------------------------------------------------------------------------------------------------------------------------------------------------------------------------------------------------------------------|-------------------------------------------------------------------------------------|
|           |                                                                                                                                        |                                                                                                                                                                                                                                                                                         | Palermo (Section Catena), 1849-60.                                                  |
| Source 13 | Giuseppe, Cirrito<br><br>Mayor of Sclafani                                                                                             | Lettera del Sindaco di Caltavuturo all'Intendente di Palermo, 14 marzo 1851, relativa ai danni provocati dall'alluvione sull'acquedotto comunale, in: Lettere, fascicolo 1, Distretto di Termini – Comune di Caltavuturo. Oggetto: Caltavuturo – Frana.                                 | Pandette Intendenza di Palermo – Spese Pubbliche, Vol. 2293 (Caltavuturo), 1847-59. |
| Source 14 | Gesualdo, Bajardo Iraggi<br>Chancellor of Caltavuturo Municipality                                                                     | Supplica degli abitanti di Caltavuturo a Carlo Filangieri, Luogotenente Generale di Sicilia, Marzo 1851, in: Lettere, fascicolo 1. Distretto di Termini. Comune di Caltavuturo. Oggetto: Caltavuturo – Frana.                                                                           | Pandette Intendenza di Palermo – Spese Pubbliche, Vol. 2293 (Caltavuturo), 1847-59. |
| Source 15 | Giulio, Benso Duca della Verdura,<br><br>Italian engineering and politician, Intendente di Palermo (b. 15 July 1816, d. 21 June 1904). | Discorso dell'Intendente di Palermo, in: Benso G. et al., Discorsi pronunciati dagli'intendenti delle province dei Reali Domini al di la [sic] del Faro nell'apertura de' consigli provinciali del 1851, Stabilimento tipografico dell'Armonia, Palermo 1851, pp. 3-31 [see pp. 11-20]. |                                                                                     |
| Source 16 | Gioacchino, Di Marzo<br>Sicilian historian (b. 2 December 1839 – d. 4 April 1916)                                                      | Footnotes, headword: "Sclafani", in: V. Amico, Dizionario Topografico della Sicilia, vol. II, Di Marzo S.- Lao F., Palermo 1859, pp. 479-480.                                                                                                                                           |                                                                                     |
| Source 17 | Guglielmo, Jervis<br><br>Italian geologist                                                                                             | Guida alle acque termali d'Italia, Loescher, Torino, 1868, 304 pp., headword: "Sclafani" [see p. 236].                                                                                                                                                                                  |                                                                                     |
| Source 18 | Carlo, Possenti, (b. 21 November 1806, d. 19 December 1872)<br>Inspector of surveyor department and Italian deputy                     | Relazione al signor ministro dei lavori pubblici in visita delle opere di ponti e strade e di porti, spiagge e fari nelle provincie [sic] siciliane, Milano, Tipografia Internazionale, 1865, 192 pp. [see p. 72-73].                                                                   |                                                                                     |
| Source 19 | Carlo, Giachery<br><br>Italian architect (b. 28 June 1812 – d. 31 August 1865)                                                         | Memoria descrittiva della Sicilia e de' suoi mezzi di comunicazione sino al 1860 a guida della carta di Sicilia riprodotta ed incisa dall'ingegnere Francesco Badalamenti, Palermo, Pedone-Lauriel, 1861, 64 pp. [see p. 12].                                                           |                                                                                     |
| Source 20 | Francesco, Pignocco<br><br>Italian physician, doctor of Palermo's mental hospital (Real Casa dei Matti)                                | Lettera sulle acque di Sicilia. Palermo, 10 maggio 1862, citata in Marieni L., Geografia medica dell'Italia, Milano, Vallardi, 1870, headword: "Sclafani", pp. 517-518 [see p. 518].                                                                                                    |                                                                                     |
| Source 21 | Giuseppe Scipione Vinaj (b. 1 January 1853 – d. 11 June 1921) and Rodolfo Pinali<br><br>Italian physicians                             | Le acque minerali e gli stabilimenti termali idropinici ed idroterapici d'Italia, vol. 2, a cura della società A. Wassermann & C., Milano, Grioni, 1923, headword: "Sclafani", pp. 391-393 [see p. 392].                                                                                |                                                                                     |
| Source 22 | P. Battaini, Giambattista Magrini, Giovanni Vaccai<br><br>Italian men of letters                                                       | La nuova Italia, dizionario amministrativo, statistico, industriale, commerciale dei comuni del Regno etc., Milano, Vallardi, 1908, vol. 3 (R-Z), headword: "Sclafani", p. 295.                                                                                                         |                                                                                     |

**Original language:**

| Source    | Original language                                                                                                                                                                                                                                                                                                                                                                                                                                                                                                                                                                                                                                                                                                                                                                                                                                                                                                                                                                                                                                                                                                                                                                                                                                                                                                                                                                                                                                                                                                                                                                   |
|-----------|-------------------------------------------------------------------------------------------------------------------------------------------------------------------------------------------------------------------------------------------------------------------------------------------------------------------------------------------------------------------------------------------------------------------------------------------------------------------------------------------------------------------------------------------------------------------------------------------------------------------------------------------------------------------------------------------------------------------------------------------------------------------------------------------------------------------------------------------------------------------------------------------------------------------------------------------------------------------------------------------------------------------------------------------------------------------------------------------------------------------------------------------------------------------------------------------------------------------------------------------------------------------------------------------------------------------------------------------------------------------------------------------------------------------------------------------------------------------------------------------------------------------------------------------------------------------------------------|
| Source 1  | <p><i>Deliberazione del decurionato di Sclafani, 1° Aprile 1850 – Orazio Sciarrino 2° eletto facente funzione di Sindaco.</i></p> <p>...esito urgente onde [per] acconciarsi [sic, aggiustarsi] la necessaria via Comunale nelle Timpi [nelle Timpe, mulattiera congiungente i Bagni con abitato di Sclafani] rotta dalle frane (...) tale via è urgentissima, e necessaria la spesa perche [sic, perché] di continuo traggito [sic, tragitto] ed imprescindibile [sic, imprescindibile] ai Comunali che reconsi [sic, si recano] nelle campagne, e fondi, alli [sic, ai] molini, ed alli Bagni, e che si richiede perciò un pronto riparo onde [per] rendersi praticabile [sic, praticabile]... [spesa: ducati 36]</p>                                                                                                                                                                                                                                                                                                                                                                                                                                                                                                                                                                                                                                                                                                                                                                                                                                                             |
| Source 2  | <p><i>Sottintendenza del Distretto di Termini, 11 settembre 1851</i></p> <p>...[è] urgente che sia riparato il Ponte Comunale di Sclafani in Contrada Giardinello e Balata Rossa rovinato dallo alluvione dell'inverno scorso, giacché soggiungessero le acque autunnali che potrebbero farlo crollare, il Sindaco mi ha fatto tenere le corrispondenti perizie e deliberazione decurionale.</p> <p>[Antonino Orlando, Sottintendente del Distretto di Termini Imerese]</p>                                                                                                                                                                                                                                                                                                                                                                                                                                                                                                                                                                                                                                                                                                                                                                                                                                                                                                                                                                                                                                                                                                         |
| Source 3  | <p><i>Corpo degli Ingegneri di Acque e Strade - Lavori Pubblici della Provincia di Palermo n. 123 - 25 novembre 1851. Oggetto: Per i mulini di Sclafani.</i></p> <p>...Mulini danneggiati dalla frana che intendeansi [sic, si intendevano] riparare, erano i mulini (...) sotto lo Stabilimento dei Bagni di Sclafani di proprietà del duca di Ferrandina non già della Comune [sic, del Comune], e qui (...) più non esistono che la frana che distrusse lo stabilimento dei Bagni li investì e ridusse ad un cumulo di macerie...</p>                                                                                                                                                                                                                                                                                                                                                                                                                                                                                                                                                                                                                                                                                                                                                                                                                                                                                                                                                                                                                                            |
| Source 4  | <p><i>8 aprile 1851</i></p> <p>Eccellenza, / Se la comune [sic, il comune] di Sclafani andò esente dalle rovine che le frane recarono nei vicini Paesi per effetto delle ultime impetuose piogge non lo fu però il Territorio di essa Comune. Le pubbliche strade vicine alla medesima ebbero in tale congiunture a soffrir pure dei forti guasti per la loro naturale alpestre posizione e l'unica sorgiva d'acqua detta Xhaliimirici [sic] la quale provvedeva [sic, provvedeva] tutta intera la popolazione di cui si necessario elemento non poté affatto sfuggire ai colpi della devastatrice frana. I mulini poi furono anche essi diroccati talché provvedimento [sic, provvedimento] pronto ed efficace rende necessario. Alla sorgiva dell'acqua si incominciò tostamente [sic, subito] a riparare dal Sindaco facendo togliere tutta quella massa di terra che la copriva esgombrire [sic, sgombrare] al tempo medesimo le pubbliche vie dalla terra recatavi dalle frane, con pure facendo incavare taluni punti le strade già rovesciate [sic, danneggiate]. Quanto per ai mulini ho dato incarico allo Ingegnere D[o]n. Tommaso Zangara [titolo, nome e cognome, sopra rigo] d'accedere subito per luogo e d'accordo col Sindaco verificare lo stato delle cose e proporre l'occorrente circa il mezzo da adottarsi sia per la attivazione dei mulini abbattuti, sia per la ricostruzione dei nuovi se quelli non fossero suscettibili di acconciamenti [sic, acconci].</p> <p><i>Al Signore: Il Signor Intendente della Provincia di Palermo - Spese Comunali</i></p> |
| Source 5  | <p><i>Sottintendenza di Termini n. 1419 – Termini, 28 marzo 1851</i></p> <p>Signore, / Il Sindaco di Sclafani con urgenza mi ha spedito un urgente rapporto "credo che Ella a quest'ora non ignora le impetuose acque che han [sic, hanno] rovinato con le frane questi vicini Comuni, dalle quali non fu esente questo Territorio, ma grazie all'Altissimo è rimasto illeso questo abitato, però nell'ambito d'esso le frane han coperto [sic, coperto] e rovinato le pubbliche strade, per la naturale sua alpestre posizione, nonché l'unica sorgiva d'acqua detta Xhanimirici [sic, leggi: Scianimirici], la quale provvede tutta l'intera popolazione. I clamori di questi naturali [nativi del luogo] mi han costretto ad un pronto riparo a scovertare [sic, scoprire] la detta acqua con togliere tutta quella massa di terra che la copriva [sic, copriva]; a sgombrare le pubbliche vie da quella quantità di terra condotta dalla frana, incavare taluni punti di strade rovesciati [danneggiati] dalla stessa, e ciò prontamente per non far reclamare a lungo la popolazione. [spese per i lavori: ducati 32.70]</p> <p><i>Antonino Orlando</i></p>                                                                                                                                                                                                                                                                                                                                                                                                                    |
| Source 6  | <p><i>Palermo, 18 agosto 1851 / Eccellenza, / Il Governo non ignora che lo stabilimento dei bagni minerali di Sclafani di proprietà del Duca di Ferrandina non andò esente dalla rovina dello alluvione di Marzo ultimo. E esso, come tanti fabbricati esistenti nei vari comuni di quella Provincia rimase vittima dei movimenti franosi seguiti allora in quelle terre.</i></p> <p><i>Il Decurionato [sollecita] che si interPELLI il riferito Duca di Ferrandina a far di manifestare se voglia riedificare quel fabbricato già distrutto dalla forza della frana, oppure abbandonandolo e rilasciare i dritti [sic, diritti] alla Comune sulla sorgiva delle acque per fabbricare quattro stanze per uso dei Comunisti [abitanti del comune di Sclafani]...</i></p>                                                                                                                                                                                                                                                                                                                                                                                                                                                                                                                                                                                                                                                                                                                                                                                                             |
| Source 7  | <p><i>Deliberazione del Decurionato di Sclafani, 25 gennaio 1854 – Oggetto: Frana per copiose acque nel detto mese.</i></p> <p>...primieramente all'imboccatura della strada interrotta del Ponte di Giardinello, secondo la strada della Valle, terzo la strada della Biviratoja [sic, Abbeveratoio] inferiore ed il masso che incombrò [sic, ingombrò] la via delli Timpi [delle Timpe, mulattiera congiungente i bagni termali con abitato di Sclafani] sia tolto perche [sic, perché] questa popolazione è stata in questi quattro punti sequestrata dal tragitto, ma anche i passeggeri [sic, passeggeri] transitando pel detto ponte comunale... [costo dei lavori: ducati 30].</p>                                                                                                                                                                                                                                                                                                                                                                                                                                                                                                                                                                                                                                                                                                                                                                                                                                                                                           |
| Source 8  | <p><i>Memoria di fatto sulli [sic, sui] Bagni di Sclafani, 21 febbraio [1854] n. 3838</i></p> <p>...nel 1851 per una frana o conscendimento [sic, scoscendimento] di terreno lo stabilimento sudetto [sic, suddetto] restò del tutto diroccato e il terreno franato in modo che si è nella impossibilità di porsi [sic, potersi] nuovamente costruire nel sito istesso [sic, stesso]...</p>                                                                                                                                                                                                                                                                                                                                                                                                                                                                                                                                                                                                                                                                                                                                                                                                                                                                                                                                                                                                                                                                                                                                                                                         |
| Source 9  | <p><i>Sottintendenza del Distretto di Termini, Termini 24 marzo 1854 – n. 2559. / Il Sindaco di Sclafani ha fatto procurarmi deliberazione colla quale quel Decurionato spinto dal bisogno e dalla urgenza deliberava di eseguirsi dei ripari in diversi punti delle strade esterne del Comune rovinata dalle copiose acque cadute in Gennaio ultimo, onde [per] aprire il passaggio agli abitanti ed ai viandanti.</i></p> <p>[Antonino Orlando, Sottintendente al Distretto di Termini]</p> <p><i>Al Signore: Il Signor Intendente della Provincia di Palermo - Spese Comunali.</i></p>                                                                                                                                                                                                                                                                                                                                                                                                                                                                                                                                                                                                                                                                                                                                                                                                                                                                                                                                                                                           |
| Source 10 | <p><i>5° Altronde che allorquando il Signor Duca di Ferrandina fece compra di dette terre particolari impendio [sic, in pendio] e sopra poste allo stabilimento, negli anni 1847 e 1848, lo stabilimento dei Bagni nelle terre comunali ed il bagno per uso dei</i></p>                                                                                                                                                                                                                                                                                                                                                                                                                                                                                                                                                                                                                                                                                                                                                                                                                                                                                                                                                                                                                                                                                                                                                                                                                                                                                                             |

|           |                                                                                                                                                                                                                                                                                                                                                                                                                                                                                                                                                                                                                                                                                                                                                                                                                                                                                                                                                                                                                                                                                                                                                                                                                                                                                                                                                                                                                                                                                                                                                                                                                                                                                                                                                                                                                                                                                                                                                                                                                                                                                                                                                                                                                                       |
|-----------|---------------------------------------------------------------------------------------------------------------------------------------------------------------------------------------------------------------------------------------------------------------------------------------------------------------------------------------------------------------------------------------------------------------------------------------------------------------------------------------------------------------------------------------------------------------------------------------------------------------------------------------------------------------------------------------------------------------------------------------------------------------------------------------------------------------------------------------------------------------------------------------------------------------------------------------------------------------------------------------------------------------------------------------------------------------------------------------------------------------------------------------------------------------------------------------------------------------------------------------------------------------------------------------------------------------------------------------------------------------------------------------------------------------------------------------------------------------------------------------------------------------------------------------------------------------------------------------------------------------------------------------------------------------------------------------------------------------------------------------------------------------------------------------------------------------------------------------------------------------------------------------------------------------------------------------------------------------------------------------------------------------------------------------------------------------------------------------------------------------------------------------------------------------------------------------------------------------------------------------|
|           | <p>bagni a Sclafani trovatisi di già formato per effetto del suaccennato atto di transazione del 28 aprile 1846....</p> <p>.....Muraglione [a monte dello stabilimento termale] che per scoscendimento avvenutosi fu trasportato al di dentro della terra comuni...</p>                                                                                                                                                                                                                                                                                                                                                                                                                                                                                                                                                                                                                                                                                                                                                                                                                                                                                                                                                                                                                                                                                                                                                                                                                                                                                                                                                                                                                                                                                                                                                                                                                                                                                                                                                                                                                                                                                                                                                               |
| Source 11 | <p>Amministrazione Duca [ducato] di Ferrandina, 27 febbraio 1856 – Oggetto: Pretesa dei Sclafanesi [abitanti di Sclafani] sia riedificato il locale di quei bagni.</p> <p>Eccellenza [all'Intendente di Palermo],<br/> .....la Duca di Ferrandina ha riparato i Bagni e di giorno in giorno li aumenta in fabbriche ed in commodità [sic, comodità] in guisa che da più tempo moltissime persone vi sono accorse e vi accorrono facendo uso di quelle acque minerali, manca l'oggetto di qualsiasi lagnanza per parte di quei comunisti [abitanti del comune]....</p> <p><i>Girolamo Artale</i></p>                                                                                                                                                                                                                                                                                                                                                                                                                                                                                                                                                                                                                                                                                                                                                                                                                                                                                                                                                                                                                                                                                                                                                                                                                                                                                                                                                                                                                                                                                                                                                                                                                                   |
| Source 12 | <p>Al Signor Intendente di Palermo.<br/> Eccellenza,/ Il Popolo del Comune di Sclafani</p> <p>.....[esistevano] alla distanza di circa ad un miglio [da Sclafani] quattro molini che davano tutta la comodità di molire tanta quantità di generi cereali ch'erano d'uopo [sic, di bisogno] alla sussistenza del medesimo. / Le dirotte acque del 12 e 13 Marzo 1851 cagionarono [sic, cagionarono] un conscendimento [sic, scoscendimento] di terra [sic, terreno] che seco tirò in rovina non solo lo stabilimento dei Bagni, ma ancora il più prezioso vantaggio di cui fu fatto parola. Sicché avvenne la sventura, nel tempo medesimo si cercò di darsi il riparo. I suoi rappresentanti pregarono la Bontà dell'Ecc[ellenza]. V[ost]ra. per la nuova costruzione al meno di un molino, ma sono trascorsi otto anni ed egli [sic, esso] giace in questa sventura...</p> <p><i>Sclafani, 24 Dicembre 1858</i></p>                                                                                                                                                                                                                                                                                                                                                                                                                                                                                                                                                                                                                                                                                                                                                                                                                                                                                                                                                                                                                                                                                                                                                                                                                                                                                                                  |
| Source 13 | <p>Caltavuturo, 14 marzo 1851 / Amministrazione Civile in Caltavuturo n. 100 – Oggetto: Per un danno arrecato dallo alluvione al corso dell'acqua de' cannoli [conduttura idrica].</p> <p>Eccellenza, / Lo straordinario [sic] alluvione verificato la notte scorsa, facendo accrescere il volume dell'acqua al vallone [torrente] dell'acqua del cannolo, che passa vicino al corso grande dell'acqua de' cannoli, devastò il selciato sopraposto [sic, sovrapposto] al corso, e voraginando [sic, scavando] in un punto il corso sudetto [sic, suddetto] infranse il doccionato [conduttura idrica], con intersecare il corso, per cui l'acqua non proveniva più alla fonte, ed arenando parte del detto doccionato, questa mattina gli abitanti restarono privi dell'acqua, con somma confusione di un intero popolo. In vista del clamore generale, ho dovuto spedire un Capo Maestro, e due Calabresi, onde [per] riparare l'inconveniente verificato, ed accanziare il corso rotto, per non far perire un popolo senz'acqua. Do alla E. V. rapporto di questo avvenimento, per la sua superiore intelligenza. / Il Sindaco / Giuseppe Dr. Cirrito</p>                                                                                                                                                                                                                                                                                                                                                                                                                                                                                                                                                                                                                                                                                                                                                                                                                                                                                                                                                                                                                                                                           |
| Source 14 | <p>Eccellenza, / Lo stato desolante, ed afflittivo in cui trovasi l'infelice popolo di Caltavuturo, muove que' [sic, quegli] abitanti ad umiliare a' [sic, ai] piè [sic, piedi] dell'E[ccellenza]. V[ost]ra. le più vive suppliche.</p> <p>Gli alluvioni continuamente verificati, dal giorno nove al tredici di questo mese, apportarono l'estermio [sic, sterminio], e la desolazione, a tutti gli allodj [terreni privati], ed ex feudi del territorio. Le contrade le più deliziose e ricche d'alberi dogni [sic, d'ogni] sorta, gettate sossopra [sic, sottosopra] da una grande mozione [movimento] franosa, sono divenute profondissime voragini. Le case di campagna dirute e trascinate da un punto ad un altro. Non si [ri]conoscono più limiti divisorj, ma tutto osservarsi una confusione. Il più ricco proprietario di latifondi, divenuto in istato [sic, stato] di povertà. Lo stabilimento salutivo [sic, salutare] de' [sic, dei] bagni di Sclafani per lo quale l'Eccellentissimo Signor Duca di Ferrandina aveva [sic, aveva] prodigato da [sic] circa a trentaseimila ducati, in beneficio della povera umanità, non è più, e quel sito delizioso, e mirabile, divenuto profondissima voragine. Tutti li fondi contigui colle rispettive casine voraginati [inghiottiti], e distrutti. Nel volto d'ogni Cittadino, vi si legge lo squallore della morte, tanto per le sofferte perdite caggionate [sic, cagionate] dall'inaspettato flagello, quanto dal timore concepito per le frane che si sono verificate al di sopra dell'abitato [di Caltavuturo], che minacciano rovina all'intero Comune. Le Mozioni sono continue. Lo spavento è universale. Ché [sic] Dio nol [sic, non lo] permetta di continuare le acque altrimenti il Comune andava [sic, andrà] in rovina e tanti infelici vittime avranno sepolcro sotto le fabbriche [sic, gli edifici].</p> <p>[A sua Eccellenza L'Esimo Prinde di Satrjano Luogotenente Generale di Sicilia, Carlo Filangeri].</p>                                                                                                                                                                                                                                            |
| Source 15 | <p>OPERE PUBBLICHE PROVINCIALI E COMUNALI. Molto erasi [ sic, si era] praticato pria [sic, prima] del 1848, nella strada da Cerda per Caltavuturo (...) io non parteggio affatto per questo sperpero di fondi, ed incominciamento disunito di lavori. — Sventuratamente il benfatto che costato era tanta spesa andò in parte perduto. Questa deputazione non tardò farne ricominciare i lavori di continuazione nel tratto di Cerda [oggi comune in Provincia di Palermo] e Sclafani, e molto vi si progrediva, quando gli alluvioni vi apportarono nuove frane, e forti guasti: cosicché i lavori si sono dovuti sospendere per poco, e vi è stato inviato l'ingegnere signor Patti direttore di quella strada per riferire su l' accaduto, e proporre l'occorrente (...)</p> <p>Egredi Signori, forse tropp'oltre [sic, troppo oltre] mi sono dilungato su questo articolo di opere pubbliche provinciali e comunali, e pure dovrei ancor dire sui funesti effetti cagionati dagli alluvioni nei giorni 12 e 13 dell'andato marzo. Mi parrebbe mancare a me stesso s'io ne tacessi affatto, e però in tralasciandone ogni minuta particolarità spero non istancarne [sic, stancarne] soverchiamente la vostra attenzione (...).</p> <p>Le più triste conseguenze ne ebbero i paesi di Montemaggiore e Caltavuturo, nei quali una non indifferente parte delle rispettive abitazioni rimasero atterrate, ed ove inabissate; minacciate tutte. Fu veramente grandissima ventura il non restarne vittima alcuno individuo, ma le sostanze di molti andarono perdute. (...) Lo Stabilimento dei Bagni di Sclafani tanto caro per la salute dell'uomo, e sì riccamente dal proprietario non è guari migliorato, fu trascinato a rovina.— Ricevute appena tali infauste nuove dolorose, da me, ed appresso dal real Governo con vivissimo rammarico, furono per ogni dove spediti Ingegneri [sic, ingegneri], date subitanee disposizioni per ovviarsi ad altri mali, ed in quanto ai comuni di Montemaggiore e Caltavuturo fu particolarmente consentito dal real Governo, che dalla cassa della provincia si fossero prestate delle somme, e queste messe a disposizione dell' architetto colà spedito e delle commissioni locali.</p> |
| Source 16 | <p>Alle radici del monte di Sclafani, a circa 2 m[iglia siciliane] [2,9732 km] dal paese, scaturiscono in una grotta le famose acque termo-minerali, che per un acquidotto [sic, acquedotto] coperto incanalate, scorrono insino al luogo dei bagni. (...) Ivi sorgeva di già compiuto nel 1851 il grande edificio dei bagni, che avea [sic, era] costato la spesa di duc[ati]. 33000 al sig. duca di Bivona della famiglia [Álvarez de Toledo duca di] Ferrandina, nel di cui podere è la sorgente. Erasi iniziato nel 1846, e già apprestava comodissimo e decente asilo alla gente che veniva a curarsi, preso a buon diritto il nome frai [sic, fra i] primarij [sic, primari] stabilimenti dell'Isola. Ma nel giorno 19 [sic, 13] marzo dello stesso anno 1851, franatosi sciaguratamente il terreno per le copiose piogge, diede irreparabile crollo all'edificio, di cui più non si osservano che</p>                                                                                                                                                                                                                                                                                                                                                                                                                                                                                                                                                                                                                                                                                                                                                                                                                                                                                                                                                                                                                                                                                                                                                                                                                                                                                                                          |

|           |                                                                                                                                                                                                                                                                                                                                                                                                                                                                                                                                                                                                                                                                                                                                                                                                                                                                                                                                                                                                                                                                  |
|-----------|------------------------------------------------------------------------------------------------------------------------------------------------------------------------------------------------------------------------------------------------------------------------------------------------------------------------------------------------------------------------------------------------------------------------------------------------------------------------------------------------------------------------------------------------------------------------------------------------------------------------------------------------------------------------------------------------------------------------------------------------------------------------------------------------------------------------------------------------------------------------------------------------------------------------------------------------------------------------------------------------------------------------------------------------------------------|
|           | <i>miserande ruine [sic, rovine]. Per quanto grande sia stata la sventura, non è a deplorarsi che la perdita dell'opera e della spesa erogata, poiché le acque nella medesima qualità ed abbondanza che prima, sono rimaste.</i>                                                                                                                                                                                                                                                                                                                                                                                                                                                                                                                                                                                                                                                                                                                                                                                                                                 |
| Source 17 | <i>Nell'anno 1846 il duca di Bivona [Giuseppe Álvarez de Toledo], proprietario delle acque [dei Bagni di Sclafani], mise mano all'erezione di nuovi bagni. Appena costruito il fabbricato fu distrutto da una frana successa nel 1851, essendo stato scelto con poco criterio il sito di questo.</i>                                                                                                                                                                                                                                                                                                                                                                                                                                                                                                                                                                                                                                                                                                                                                             |
| Source 18 | <i>Provincia di Palermo. Strada (...) da Termini a Taormina. Questo secondo tronco [da Cerda sino a Caltavuturo] fu in origine, ossia nel 1847, progettato e in parte costruito [sic, costruito], con passaggio per Sclafani in base ad una perizia di L. 47,488.6811 vi si spese quasi altrettanto, ma dapprima le sospensioni di lavoro per le rivoluzioni del 1848 e 1850, poi la straordinaria alluvione del 1851, che ivi prese il nome di frana di Sclafani, non solo distrussero quasi ogni traccia di lavori, ma fecero conoscere l'impossibilità di condurre per quella linea una strada servibile; si compilò allora il progetto per la valle del [torrente] Caltavuturo, e se ne fece ascendere la perizia a L. 224,332.00 perizia che attualmente è già sorpassata dalle spese fatte, mentre il compimento dei lavori esigerà forse poco meno di altrettanto, anche perché nel progetto furono ommessi [sic, ommessi] i due ponti sui torrenti Salito e Caltavuturo, a cui e pur d'uopo pensare, e i di cui progetti sono a quest'ora approvati.</i> |
| Source 19 | <i>Aggirandoci per la parte settentrionale, in Termini vi sono le acque termali Imeresi d'indole amara e salmastra, ove nelle stagioni temperale vi accorrono gran numero di persone a bagnarsi; come anco [sic, anche] per ispeciali [sic, speciali] malattie molti si dirigevano [sic, dirigevano] alle falde del monte ove resta Sclafani per trar profitto dalle termali acque sulfuree che vi scaturiscono; ma per un cataclisma avvenuto in quelle terre nel 1852 [sic, 1851] venne lo stabilimento colà esistente rovesciato.</i>                                                                                                                                                                                                                                                                                                                                                                                                                                                                                                                         |
| Source 20 | <i>L'acqua minerale era introdotta in questo Bagno mediante un acquedotto coperto. Ma questo edificio [sic, edificio], che già annoveravasi fra i migliori della Sicilia, il 19 [sic, 13] marzo dell'anno 1851, restò totalmente rovinato e seppellito sotto una frana del monte. — Essendo però, in mezzo a questa disgrazia, rimasta intatta l'acqua minerale, il medesimo duca riedificò un nuovo stabilimento balneario, nel quale i malati trovano quanto loro può abbisognare.</i>                                                                                                                                                                                                                                                                                                                                                                                                                                                                                                                                                                         |
| Source 21 | <i>Nel 1851 una frana che si era distaccata dal monte aveva completamente distrutto lo stabilimento che fin dal 1846 era stato costruito dalla nobile famiglia Alvarez. L'attuale costruzione venne rifatta dopo il disastro di quel tempo.</i>                                                                                                                                                                                                                                                                                                                                                                                                                                                                                                                                                                                                                                                                                                                                                                                                                  |
| Source 22 | <i>Nel 1846 vi s'innalzò [sic, innalzò] uno stabilim[ento]. balneario, ma nel 1851 fu seppellito da una frana staccatasi dal m[onte]. sovrastante alla sorg[ente].</i>                                                                                                                                                                                                                                                                                                                                                                                                                                                                                                                                                                                                                                                                                                                                                                                                                                                                                           |

**Table S3 | Dataset: selected documentary evidences of the 1851 rainstorm - data provided by Antonio Contino, Patrizia Bova and Giuseppe Esposito.**

| Sources     | Originator(s)                                                                  | Title                                                                                                                                                                                                                                                                                                                                                            | Archive                                                                                                        |
|-------------|--------------------------------------------------------------------------------|------------------------------------------------------------------------------------------------------------------------------------------------------------------------------------------------------------------------------------------------------------------------------------------------------------------------------------------------------------------|----------------------------------------------------------------------------------------------------------------|
| Source 1    | Antonino, Parisi<br>Director of Termini's District                             | Missiva del sottintendente di Termini Imerese all'intendente di Palermo, 14 maggio 1852, in: fascicolo 1, incartamento 1, 185, lettera a, fascicolo 1, incartamento 1, Oggetto: "Commissione [sic, commissione] per raccogliere le largizioni in sollievo de' danneggiati dallo alluvione" n. 1.                                                                 | Pandetta Intendenza di Palermo, MS. 1123 (Alluvione 1851), State Archive of Palermo (Section Catena), 1851-52. |
| Source 2    | Antonio, Paternò-Castello Prince of Manganelli<br>Mayor of Palermo             | Missiva del Pretore (sindaco) all'Intendente di Palermo, 29 aprile 1851, in: fascicolo 1 incartamento 6, Oggetto: "Danni alle Campagne".                                                                                                                                                                                                                         | Pandetta Intendenza di Palermo, MS. 1123 (Alluvione 1851), State Archive of Palermo (Section Catena), 1851-52. |
| Source 3    | Pietro, Tacchini<br>Italian astronomer                                         | Sulla pioggia raccolta all'Osservatorio del Collegio Nautico di Palermo, Giornale di Scienze Naturali ed Economiche, Anno IV, Vol IV, n. 3, Palermo, Lao, 1868, pp. 33-40; n. 5, pp. 61-80; [see p. 80].                                                                                                                                                         |                                                                                                                |
| Source 4    | Vincenzo, Mortillaro (b. 27 July 1806 – d. 26 July 1888)<br>Sicilian historian | Leggende storiche siciliane dal XIII al XIX secolo, IIIa edizione, Palermo, D. Puccio & Figlio, 1887. Legenda LI L'alluvione, pp. 264-267.                                                                                                                                                                                                                       |                                                                                                                |
| Source 5    | Luigi, (Monsignor) Del Pozzo<br>Bourbon King's Chaplain                        | Cronaca civile e militare delle due Sicilie sotto la dinastia borbonica dall'anno 1734 in poi, Napoli, Stamperia Reale, 1857, 670 pp. [see p. 590].                                                                                                                                                                                                              |                                                                                                                |
| Sources 6-9 | Anonymous                                                                      | Raccolta di Atti e decreti del governo da Gennaro 1851 in poi, vol. V, Palermo, Gagliani, 1851, 344 pp.<br>Lettere del ministro per gli affari di Sicilia in Napoli, Giovanni Cassisi, al luogotenente generale della Sicilia, Carlo Filangeri, 25 marzo 1851 [p. 88] (6); 28 marzo 1851 [p. 89] (7); marzo 1851 [p. 89-90] (8); 20 marzo 1851 [p. 127-128] (9). |                                                                                                                |

**Original language:**

| Source | Original language |
|--------|-------------------|
|--------|-------------------|

|             |                                                                                                                                                                                                                                                                                                                                                                                                                                                                                                                                                                                                                                                                                                                                                                                                                                                                                                                                                                                                                                                                                                                                                                                                                                                                                                                                                                                                                                                                                                                                                                                                                                                                                                                                                                                                                                                                                                                                                                                                                                                                                                                                                                                                                                                                                                                                                                                                                                                                                                                                                                                                                                                                                                                                                                                                                                                                                                                                                                                                                                                                                                                                                                                                                                                                                                                                                              |
|-------------|--------------------------------------------------------------------------------------------------------------------------------------------------------------------------------------------------------------------------------------------------------------------------------------------------------------------------------------------------------------------------------------------------------------------------------------------------------------------------------------------------------------------------------------------------------------------------------------------------------------------------------------------------------------------------------------------------------------------------------------------------------------------------------------------------------------------------------------------------------------------------------------------------------------------------------------------------------------------------------------------------------------------------------------------------------------------------------------------------------------------------------------------------------------------------------------------------------------------------------------------------------------------------------------------------------------------------------------------------------------------------------------------------------------------------------------------------------------------------------------------------------------------------------------------------------------------------------------------------------------------------------------------------------------------------------------------------------------------------------------------------------------------------------------------------------------------------------------------------------------------------------------------------------------------------------------------------------------------------------------------------------------------------------------------------------------------------------------------------------------------------------------------------------------------------------------------------------------------------------------------------------------------------------------------------------------------------------------------------------------------------------------------------------------------------------------------------------------------------------------------------------------------------------------------------------------------------------------------------------------------------------------------------------------------------------------------------------------------------------------------------------------------------------------------------------------------------------------------------------------------------------------------------------------------------------------------------------------------------------------------------------------------------------------------------------------------------------------------------------------------------------------------------------------------------------------------------------------------------------------------------------------------------------------------------------------------------------------------------------------|
| Source 1    | <i>Noi D[o]n Antonino Parisi Sottintendente del Distretto di Termini assistito dal Segretario della Sottintendenza D[o]n Carlo Palmeri ed i Signori Reverendo D[o]n Vincenzo La Cova, Giudice (...) D[o]n Giuseppe Galici, 2° eletto f[acente] f[unzione] di Sindaco D[o]n Rocco Patiri, Capo Urbano Onorario D[o]n Francesco De Castro Culotta, e i decurioni anziani D[o]n Pasquale Navarra e D[o]n Antonino Mascari componenti la Commissione [sic, Commissione] istituita alla venerata ministeriale del dì 1 Aprile 1851 per la raccolta e distribuzione delle obblazioni[sic, oblazioni] in pro' [sic] dei danneggiati delle buferi di Marzo del suddetto anno – ripartizione somme raccolte in sollievo dei danneggiati di questo comune capoluogo [seguono firme, ed la ripartizione delle somme di ducati 74,45 da distribuirsi alle famiglie superstiti dei pescatori terminesi [abitanti di Termini] naufragati nella bufera di Marzo 1851].</i>                                                                                                                                                                                                                                                                                                                                                                                                                                                                                                                                                                                                                                                                                                                                                                                                                                                                                                                                                                                                                                                                                                                                                                                                                                                                                                                                                                                                                                                                                                                                                                                                                                                                                                                                                                                                                                                                                                                                                                                                                                                                                                                                                                                                                                                                                                                                                                                                  |
| Source 2    | <i>Lavori da eseguirsi [a Palermo]. 1. Acquedotto da costruire nella Contrada della Molara [oggi Piazza e Via Molara] e Scorzadenaro [oggi Via Scorzadenaro] che scarichi nel fiume Oreto ed allo allagamento di certi punti dello acquedotto che in atto cioè esiste. 2. Acquedotto sotto la Porta di Castro [una delle antiche porte della città demolita nel 1879, nell'attuale Piazza Porta di Castro]. 3. Acquedotto di Porta Montalto [una delle antiche porte della città, nell'attuale Piazza Porta Montalto] fino a mare.</i>                                                                                                                                                                                                                                                                                                                                                                                                                                                                                                                                                                                                                                                                                                                                                                                                                                                                                                                                                                                                                                                                                                                                                                                                                                                                                                                                                                                                                                                                                                                                                                                                                                                                                                                                                                                                                                                                                                                                                                                                                                                                                                                                                                                                                                                                                                                                                                                                                                                                                                                                                                                                                                                                                                                                                                                                                       |
| Source 3    | <i>·Nei giorni 12 e 13 marzo 1851 pioggia dirotta, che investì la città [di Palermo] dai punti di S. Francesco di Paola [oggi Piazza S. Francesco di Paola] e Porta di Castro, sui quali punti le case terrane [a piano terreno] venivano inondate [sic, inondate], di poi [i quartieri] Ballarò [oggi Via Ballarò], Casa Professa [oggi piazza e via omonima], Lattarini [oggi Via Lattarini e Piazza Borsa], Sant'Anna [oggi Piazza S. Anna] e Porto Salvo [oggi Via Porto Salvo], da un lato, e la Piazza Nuova, Consolazione, S. Lucia, e Grandi Prigioni dall'altro presentavansi [sic, si presentavano] alla vista siccome confluenti di copiosi fiumi, ove per l'altezza dell'acqua di 1<sup>m</sup>,3 ed 1<sup>m</sup>,6 furono spinti parecchi battelli, onde [per] arrecare soccorso alle indicate abitazioni. « Il vento era ONO e in 14 ore caddero 57<sup>mm</sup> d'acqua e 69 nel giorno appresso fino alle 10<sup>h</sup> di sera, e compresa la notte del 13 al 14, si ebbe un totale complessivo di 140 millimetri, quasi la quarta parte della pioggia di un anno.</i>                                                                                                                                                                                                                                                                                                                                                                                                                                                                                                                                                                                                                                                                                                                                                                                                                                                                                                                                                                                                                                                                                                                                                                                                                                                                                                                                                                                                                                                                                                                                                                                                                                                                                                                                                                                                                                                                                                                                                                                                                                                                                                                                                                                                                                                                    |
| Source 4    | <i>Fu dapprima in fatti in un momento contristata Palermo da repentina alluvione al 1851. (...) Ingrossato dai torrenti Sabuxia [Sambuccia, oggi Torrente Vadduneddu] e Cannizzaro [Kemonia o Fiume di Maltempo, dopo l'alluvione del 1557 incanalato nell'Oreto] era uscito sfrenato dal suo letto il fiume Oreto il 12 di marzo 1851; nel quale giorno una tempesta impetuosa scaricavasi [sic, si scaricava] in pioggia stemperata. Rompendo a furia gli argini malconci ei [sic, esso] riversossi [sic, si riversò] vincente sulle pianure sottoposte, ed allagò da una parte la contrada di Passo di rigano [torrente poi canalizzato nel 1856], d'onde [per cui] ruinarono [sic, rovinarono] le acque dal punto di s. Francesco di Paola sul sobborgo occidentale sfondandolo del tutto. Da un altro lato sbucando la fiumana [sic, fiumara] ai Pagliarelli [oggi Piazza Pagliarelli] ridusse lago la Fossa della Garofala [contigua al plesso di Viale delle Scienze dell'Università di Palermo] e ne abbattè con furia le mura. Poi sbuccò [sic, sboccò] rapida in città da Porta di Castro com'erasi [sic, come si era] sempre ripetuto in simili congiunture, inondando la contrada che gli antichi chiamavano Kemonia, con greca voce, che per l'appunto significa torrente. Si riempirono d'acqua allora i sepolcreti, le botteghe e tutti gli abituri. Essendosi formati tanti stagni che la città parve un mare, fu d'uopo di adoperarsi varie barche, assai più di quanto se n'erano viste galleggiare con meraviglia nell'alluvione del 1666. Esse valsero a salvarsi da naufragio, a porgere soccorsi, ad apprestare i mezzi di trasporto nelle piazze di Casa professa, s. Anna, Lattarini, Giardinaccio [oggi Via Giardinaccio] e Portosalvo. Quivi le acque, che s'erano inoltrate per la stretta via dei Cartari e di Visita poveri e dei Cintorinari [oggi Via Alessandro Paternostro, nel tratto tra Corso Vittorio Emanuele e Piazza S. Francesco] dechinando [sic, deviando] per Toledo [oggi Corso Vittorio Emanuele] riempirono le fogne, le quali rigurgitandole fecero gorgo ed allagarono la chiesa e le casette. Né all'interno solo la città si ebbe disastro, ché lo soffersero maggiore ancora le campagne ed i villaggi; scendendo precipitosa la piena dal dorso di tutti i colli solcati da veri torrenti. Più che altrove all'Uditore [oggi Via Uditore] l'acqua copre le piante e gli arboscelli; conquassa [sic, sconquassa] solidissime muraglie, abbarra [sic, sbarra] e sconvolge il pubblico sentiero; e una melma crassa ed incessante frammista a grossi tronchi e ciottoloni [sic, grossi ciottoli] travolge nel suo impeto quanto incontra, riduce un deserto tanti vaghi giardini e tanti fertili poderi (...). Introdottesi le acque nei modesti casalini [sic, casali] si videro per tutto galleggiare i letti e le masserizie campestri. E atterrita la dolorosa ma non triste plebe dei poveri coloni dall'insolito periglio [sic, pericolo], implorava con grida disperate quel soccorso che non poterono tutti raggiungere in buon tempo; ond'essa [per cui essa] si fece strada sulle tegole attrappandosi [sic, aggrappandosi] alle travi a grande stento, mentre la pioggia suonava su i tetti come fosse grandine fitta e grossa che poi per ogni via scorreva al pari di torrente impetuoso.</i> |
| Source 5    | <i>13 marzo 1851. Un terribile uragano danneggia la città di Palermo e molti luoghi adiacenti.</i>                                                                                                                                                                                                                                                                                                                                                                                                                                                                                                                                                                                                                                                                                                                                                                                                                                                                                                                                                                                                                                                                                                                                                                                                                                                                                                                                                                                                                                                                                                                                                                                                                                                                                                                                                                                                                                                                                                                                                                                                                                                                                                                                                                                                                                                                                                                                                                                                                                                                                                                                                                                                                                                                                                                                                                                                                                                                                                                                                                                                                                                                                                                                                                                                                                                           |
| Sources 6-9 | <i>Eccellenza / Nuovo motivo di vivissimo dolore sono stati al paterno pietoso cuore di S[ua]. M[aestà], il Re N[ostro]. S[ignore]. gli altri casi lagrimevoli [sic, lacrimevoli] da V[ost]ra. E[ccellenza], riferiti nel suo pregiatissimo rapporto del 22 dell'andante, Dipartimento di Polizia, num. 474. circa i danni e le vittime del temporale dei giorni 12 e 13 di questo mese in diversi luoghi della Sicilia, / E la M[aestà]. S[ua]. nel Consiglio ordinario di Stato di ieri si è degnata ordinare, che da cotesta [sic, codesta] Tesoreria Generale si pongano a disposizione della E[ccellenza], V[ost]ra. duemila ducati, per distribuirli come crederà più conveniente tra i poveri dei Comuni, di cui è parola nel di lei Rapporto, che sono stati danneggiati dall'alluvione. / Nel Real Nome lo partecipo, all'E[ccellenza]. V[ost]ra., poiché si serva farne l'uso conveniente. / Napoli, 25 marzo 1851. / Firmato — GIOVANNI CASSISI (6).</i><br><br><i>A S[ua]. E[ccellenza]. il Tenente Generale Principe di Satriano, Duca di Taormina, Comandante in Capo il primo Corpo di Esercito, funzionante da Luogotenente Generale di S[ua]. M[aestà] in Sicilia. / ECCELLENZA / Per quanto tristi e desolanti fossero i disastri arrecati dal l'alluvione alle strade pubbliche di Sicilia, e sopra ogni altro ai Comuni di Sutura, di Montemaggiore e di Caltavuturo di cui V[ost]ra. E[ccellenza]. ha fatto lunga esposizione [sic, esposizione] nel suo riverito foglio del 26 corrente, Dipartimento Interno, n. 2636, è di non poco conforto il vedere con quanta alacrità, solerzia e preveggenza abbia V[ost]ra. E[ccellenza]. provveduto perché i danni fossero arrestati nel loro corso, soccorsi gli abitanti di quei luoghi che ne vennero colpiti, e riparati in modo da far sempre più rispondere la paterna sollecitudine del Governo del Re Nostro adorato Sovrano. / lo mi sono affrettato nella conferenza di ieri a mettere a piedi della M[aestà]. S[ua]. l'anzidetto Rapporto dell'E[ccellenza]. V[ost]ra., e S[ua]. M[aestà] penetrata sempre più della grave sciagura, volendo con la magnanimità del suo Real animo soccorrere anco [sic, anche] i poveri danneggiati nei Comuni delle Province da V[ost]ra. E[ccellenza]. indicati, si è degnata ordinare che si pongano alla disposizione dell' E[ccellenza]. V[ost]ra. altri ducati]. 4000 per distribuirli ai medesimi in quel modo che nella sua saggezza giudicherà conveniente. / Nel Real Nome partecipo a V[ost]ra. E[ccellenza]. quest'atto di Sovrana beneficenza per servirsi farne l'uso di risulta. / Napoli, 28 marzo 1851. / Firmato — GIOVANNI CASSISI (7).</i><br><br><i>A S[ua]. E[ccellenza]. il Tenente Generale Principe di Satriano, Duca di Taormina, Comandante in Capo il primo Corpo di Esercito, funzionante da Luogotenente Generale di S[ua]. M[aestà] in Sicilia. / S[ua]. M[aestà] il Re S[ignore]. M[ostro]. seguendo l'impulso del Suo clementissimo cuore, nell'apprendere i disastri cagionati dalla inondazione dei giorni 12 e 13, si è degnato largire una sovvenzione di duc[ati]. 12,000 a favore dei danneggiati, da ripartirsi da un'apposita Commissione composta da S. Ecc. il Cardinale Arcivescovo di Palermo, dal Maresciallo di Campo D[on]. Paolo Pronio e dai Cavalier</i>                                      |

D[on]. *Gioacchino Filangieri* (8).

*MINISTERO E REL SEGRETERIA DI STATO PER GLI AFFARI DI SICILIA PRESSO DI S[ua]. M[aestà] il Re M[ostro]. S[ignore]. / Dipartimento di Polizia / ECCELLENZA / Fui sollecito a rassegnare a S[ua]. M[aestà] il Re M[ostro]. S[ignore]. il pregevole foglio indirizzatomi da V[ostra]. E[ccellenza]. al 14 del corrente, onde [con cui] ha descritto il miserando e lagrimevole [sic, lacrimevole] disastro cui è stata segno la città di Palermo. E la narrazione di sì funesta disavventura, che ha minacciato la vita di molti cittadini e distrutto gran parte della lor proprietà, ha vivamente e profondamente contristato [sic, contristato] e commosso il pietosissimo animo dell'Augusto Nostro Signore. Il quale se ha diviso con cotesti [sic, codesti] suoi amatissimi sudditi il dolore delle gravi perdite che han patito, ha anche in sì deplorabile avvenimento riconosciuto, con quanta sapienza e generosa sollecitudine V[ostra]. E[ccellenza]. provvegga [sic, provveda] alla lor [sic, loro] salute, quando irreparabili sventure la travagliano. Ed io son [sic, sono] compiaciuto meco medesimo poterla manifestare, che S[ua]. M[aestà] ha pienamente approvato le provvide e salutari disposizioni prese da V[ostra]. E[ccellenza]. in tal frangente: e Le fu gratissimo [sic, molto grato] conoscere, cha ad esse, agli sforzi magnanimi di una nobile abnegazione fatta dallo Stato Maggiore, dai Pionieri, dai Marinari della Real Squadra, non che dalla Polizia, e all'operoso concorso del Municipio sia dovuta la salvezza di moltissimi cittadini. Con non minor soddisfazione ha appreso la prelodata [sic, già lodata] M[aestà] S[ua]. che eransi [si erano] dall'E[ccellenza]. V[ostra]. aperte delle sottoscrizioni, onde [affinché] la carità pubblica venga in soccorso di coloro, che cotanta calamità ha dannato alla miseria, essendo sicura, che mercè la valevole e pietosa opera della Commissione deputata da V[ostra]. E[ccellenza]. a questa umanissima missione, larghe oblazioni saran [sic, saranno] raccolte, e ripartite fra coloro che maggiori danni sostennero, e più sian [sic, siano] travagliati dalla indigenza. / Or la M[aestà] S[ua]. seguendo i benefici sentimenti del suo munificentissimo cuore, e volendo più prontamente sovvenire i poveri che furon danneggiati dall'alluvione, si è degnata disporre, che la Tesoreria appresti la somma di duc[ati]. 12,000, la quale venga fra' [sic, fra i] detti poveri equamente distribuita. Ed acciocché la Commissione eletta da V[ostra]. E[ccellenza]. non sii [sic, sia] distratta dalle gravi cure richieste dal primo ed onorevolissimo incarico commessole, S[ua]. M[aestà] ha altresì comandato, che alla distribuzione dei predetti duc[ati]. 12,000 provvegga un'altra Commissione composta di Sua Eminenza il Cardinale [di Palermo, Ferdinando Maria Pignatelli], del General [Giuseppe] Pronio e del Cav[aliere]. Filangieri di San Marco. / Le quali Sovrane disposizioni trovomi [sic, mi trovo] di aver comunicato a V[ostra]. E[ccellenza]. per telegrafo in questo stesso di da Caserta. / Nel Real Nome intanto lo partecipo a V[ostra]. E[ccellenza]. perché le piaccia farne l'uso conveniente. / Napoli 20 marzo 1851. / Firmato — GIOVANNI CASSISI (9).*

## References of additional literature and sitography

Traina, A.: Vocabolario siciliano-italiano, original edition, Palermo, 1868, Reprint, Milano, 1160 pp., 1991.

Cusatelli, G. (Eds.): Dizionario Garzanti della lingua italiana, Garzanti, Milano, 1992 pp., 1972.

De Seta, C., and Di Mauro, L.: Le città nella storia d'Italia. Palermo, Laterza, Bari, 210 pp., 1980.

Internet Archive: <http://archive.org>

Google books: <http://books.google.it>

Istituto Italiano dell'Enciclopedia Treccani: <http://www.treccani.it>

Google Earth: <http://www.google.it/intl/it/earth>

Bing Map: <http://www.bing.com/maps>



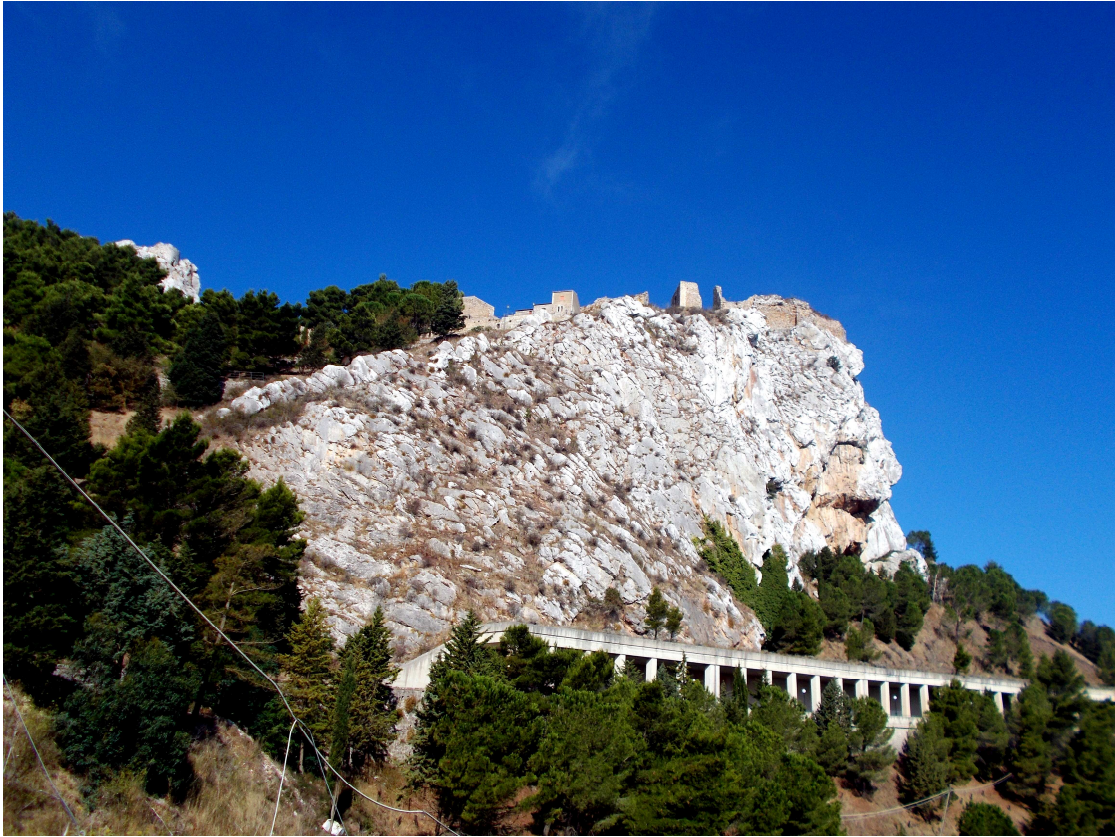

Fig. S1 – View from the east of Sclafani castle. Note the abrupt or sub-vertical/overhanging middle cliff (Ellipsactinia breccias, Crisanti Fm.) and underlying rockshed.

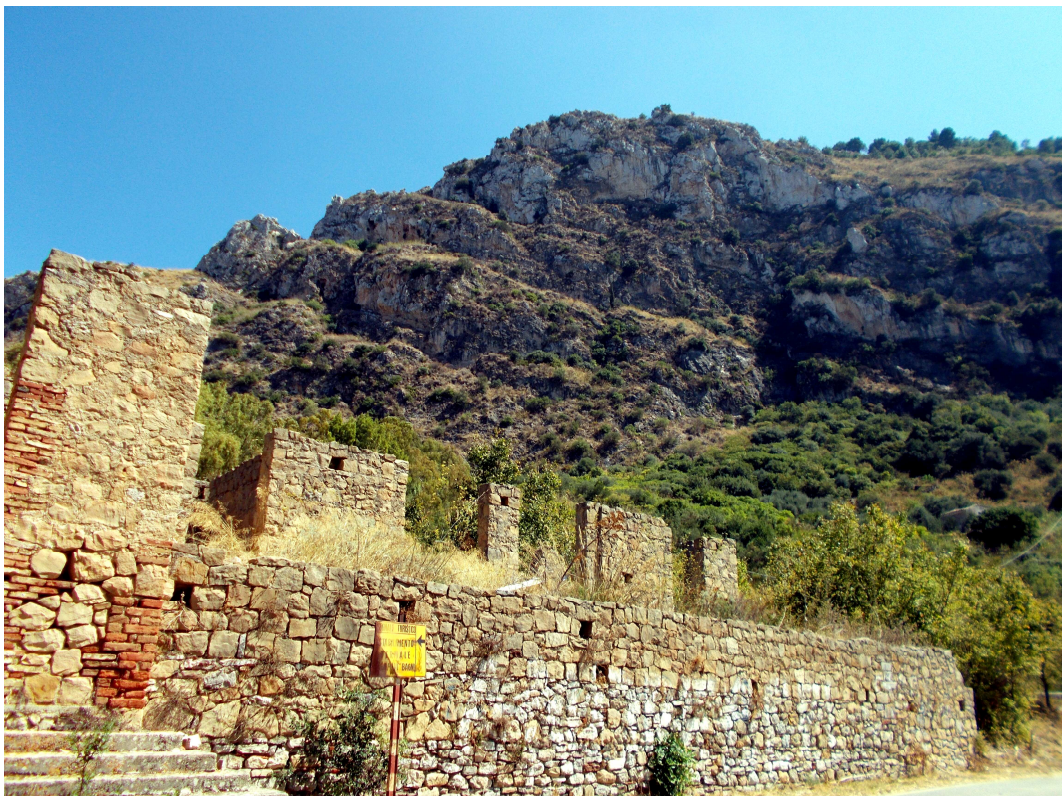

Fig. S2 – Ruins of the new thermal establishment of Sclafani (1856-57).

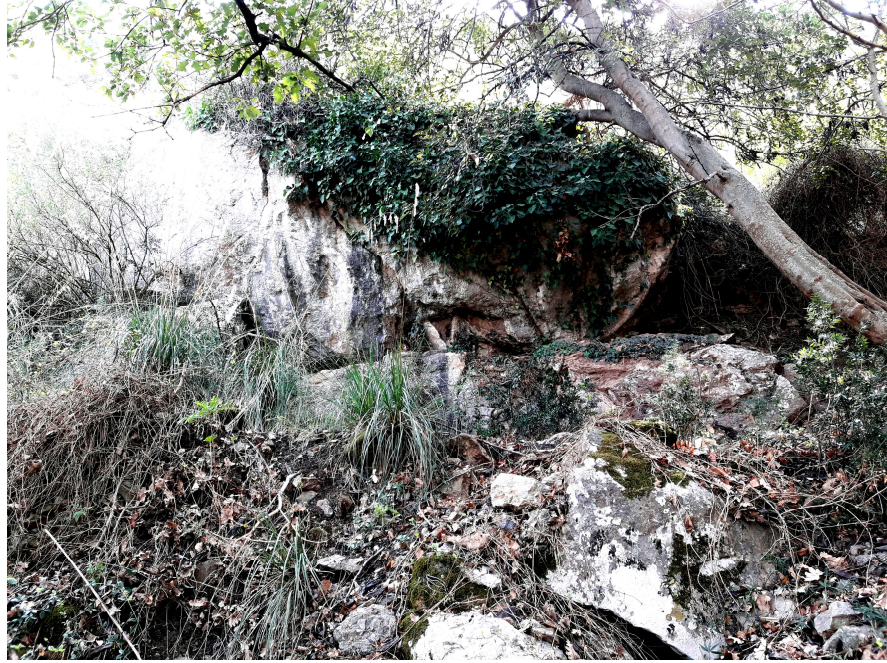

Fig. S3 – View of fallen rock blocks (Range of volumes: about 1.5 to 30 m<sup>3</sup>) at the base of Lower Cliff.
